# Supplementary material for: Can a Small Change in the Heterocyclic Substituent Significantly Impact the Physicochemical and Biological Properties of (Z)-2-(5-Benzylidene-4-oxo-2-thioxothiazolidin-3-yl)acetic Acid Derivatives?
Source: MDPI journal article supplement (doi:10.3390/s24051524), 2024-02-27
Supplement: s1 [file s1]

# Supporting Information

## Can a Small Change in the Heterocyclic Substituent Significantly Impact the Physicochemical and Biological Properties of (Z)-2-(5-Benzylidene-4-oxo-2-thioxothiazolidin-3-yl)acetic Acid Derivatives?

Agata Szlapa-Kula <sup>1,\*</sup>, Sławomir Kula <sup>1,\*</sup>, Łukasz Kaźmierski <sup>2</sup>, Anna Biernasiuk <sup>3</sup>  
and Przemysław Krawczyk <sup>4</sup>

<sup>1</sup> Institute of Chemistry, Faculty of Science and Technology, University of Silesia in Katowice, Szkolna 9 St.,  
40-007 Katowice, Poland

<sup>2</sup> Urology and Andrology, Department of Tissue Engineering, Collegium Medicum, Nicolaus Copernicus  
University, M. Curie Skłodowskiej 9, 85-094 Bydgoszcz, Poland

<sup>3</sup> Department of Pharmaceutical Microbiology, Faculty of Pharmacy, Medical University of Lublin,  
20-093 Lublin, Poland

<sup>4</sup> Department of Physical Chemistry, Faculty of Pharmacy, Collegium Medicum, Nicolaus Copernicus  
University, Kurpińskiego 5, 85-950 Bydgoszcz, Poland

\* Correspondence: [agata.szlapa-kula@us.edu.pl](mailto:agata.szlapa-kula@us.edu.pl) (A.S.-K.); [slawomir.kula@us.edu.pl](mailto:slawomir.kula@us.edu.pl) (S.K.)

### Table of Contents

|                                           |    |
|-------------------------------------------|----|
| 1. Materials .....                        | 2  |
| 2. Measurements and general methods ..... | 2  |
| 3. Synthesis, NMR and HRMS spectra .....  | 5  |
| 4. Thermal properties .....               | 15 |
| 5. DFT calculations.....                  | 15 |
| 6. Optical properties.....                | 21 |
| 7. Literature .....                       | 23 |

## 1. Materials

4-Pyrrolidinobenzaldehyde (98%, Combi-Blocks), 4-(1H-Pyrrol-1-yl)benzaldehyde (98%, Combi-Blocks), 4-(1H-Imidazol-1-yl)benzaldehyde (98%, Combi-Blocks), rhodanine-3-acetic acid (>98.0%, TCI), ammonium acetate (puriss. p.a., ACS reagent, reag. Ph. Eur.,  $\geq 98\%$ , Merck-Sigma-Aldrich), DMSO- $d_6$  (99.9 atom % D, Merck-Sigma-Aldrich), acetonitrile (pure for analysis, Chempur), acetonitrile (for HPLC-GC,  $\geq 99.8\%$  (GC), Merck-Sigma-Aldrich), dichloromethane (for HPLC,  $\geq 99.8\%$ , contains amylene as stabilizer, Merck-Sigma-Aldrich), chloroform (for HPLC,  $\geq 99.8\%$ , amylene stabilized, Merck-Sigma-Aldrich), methanol (for HPLC,  $\geq 99.9\%$ , Merck-Sigma-Aldrich), DMSO (pure for analysis, Chempur), THF (pure for analysis, Chempur), Toluene (pure for analysis, Chempur), glacial acetic acid (99,5% pure p. a, Chempur).

## 2. Measurements and general methods

Bruker Avance 400 MHz instrument used to record the NMR spectra in DMSO- $d_6$  (as solvent). Thermogravimetric analysis was performed on Perkin Elmer Thermogravimetric Analyzer Pyris 1 TGA at a heating rate of 15°C/min under nitrogen. UV/Vis spectra were recorded with a Biosens model UV 5600 UV/Vis spectrophotometer. Photoluminescence emission spectra were acquired using Hitachi Fluorescence Spectrophotometer F-7100. The photoluminescence quantum yields of the (Z)-2-(5-benzylidene-4-oxo-2-thioxothiazolidin-3-yl)acetic acid derivatives were determined relative to Rhodamine B in methanol as a standard ( $\Phi_{\text{ref}}=0.7$ )<sup>1</sup>, using the literature procedure<sup>1</sup>.

### *In vitro* culture

Mouse fibroblasts (3T3 – NIH3) were used as a model cell line for compound cytotoxicity testing. T24 (Human, Urinary bladder Transitional Cell Carcinoma) and SV-HUC1 (Human, uroepithelium epithelial cell line) were used for testing staining procedures for fixed cells. Before the experiment started, the cell lines were in culture for at least five passages. Standard, recommended culture conditions were applied: 37°C, 5% CO<sub>2</sub>, 98% humidity, DMEM/F12K (Corning USA) medium was used for 3T3 and T24 cells, for SV-HUC1 RPMI medium was the dedicated choice (Corning USA). All media were supplemented with 10% FBS (Corning USA) and a recommended dose of antibiotics.

### Stock reagent preparation

The stock solution of all reagents was prepared in cell culture certified DMSO (Dimethyl sulfoxide, BioUltra purity, Merck, USA). After dissolving the compounds, they were centrifuged for 5 minutes at 1000xg and filtered using a 0,22 µm syringe filter (PES Millex-GP).

### **Cytotoxicity assay and Live-cell staining**

To determine the cytotoxicity of the tested compounds, we evaluated both short-term (1h) and long-term (24h) expositions toxicity starting from the dilution of 10µg of substance per 1 ml of culture media. After the exposition phase, the MTT assay was performed for short-term and long-term experiments. Before exposition, cells were seeded in 96 microplates (Nunc FB TC) at a density of 8000 cells/well and pre-incubated for 24 hours before the addition of the tested compound. After the pre-incubation, the medium was discarded, and all wells were washed twice with PBS. Tested compounds were pre-diluted in culture medium at a range of concentrations (20µg/ml to 0,002 µg/ml). After the exposition period, the tested compounds were discarded, and all wells were washed 2x with PBS. Directly after that, the MTT assay procedure was performed.

To observe the live-cell staining capabilities of the tested compounds, we have conducted observations during the exposition phase of the MTT assay. Cell staining progress was monitored using a fluorescence microscope (IX83, Olympus) after 1h and 24h of staining.

The MTT assay starts with the addition of the MTT reagent (Thiazolyl Blue Tetrazolium Bromide, Sigma) at a concentration of 1mg/ml diluted in DMEM medium without phenol red. After 2 hours of incubation, the MTT solution is discarded, and 100µl of DMSO is added. The absorbance is read at 570nm using a multi-plate reader (Multiskan Sky, Thermo, USA). The results presented contain % survivability based on the acquired absorbance compared to the untreated control.

### **Imaging**

Before performing the imaging step, we assessed the effect of the fixation method on the staining effectiveness. For that, we fixed cells with 4% Formaldehyde (methanol-free) and with ice-cold 96% ethanol for 15 minutes. After two PBS washes, we left the cells for 24 hours with a 0.1% TRITON-X solution. After this incubation, the cells were again washed with PBS, and staining solutions were added. The staining solutions contained 1µg of the tested compounds per 1 ml PBS.

Fluorescence imaging of all samples was performed using a fully motorized, inverted IX83 microscope (Olympus, Japan) with Orca Flash LT3 Plus monochromatic camera

(Hamamatsu, Japan). An LED light source - pE-300 ultra (Colled, Great Britain)- was used to ensure low photobleaching and narrow excitation wavelengths. U-FUNA, U-FBNA, U-FGW, and U-FMCHE filter cube custom-made equivalents were used (Olympus, Japan) for the channels correlating to the UV, FITC, TRITC, and 647/Cy3 channels. Focusing was performed with a semi-automated system using laser autofocus (Z-Drift Compensation Unit, Olympus, Japan).

### **Compound compatibility with nuclear stains and mounting methods**

Cells were prepared the same way as in the Imaging Paragraph, with the difference being the growth surface. Cells were cultured on imaging coverslip glasses. After fixation with 4% Formaldehyde, 10µg/ml of the tested compounds were used with the DAPI stain (300nM) for 60 minutes, and cells were washed with PBS afterward. Next, the coverslips were mounted with a non-aqueous (Eutkitt) and aqueous (Vectashield Vibrance) mounting media to assess their compatibility.

### ***In vitro* antimicrobial assay**

The examined compounds **A-1 – A-3** were screened *in vitro* for antibacterial and antifungal activities using the broth microdilution method according to European Committee on Antimicrobial Susceptibility Testing (EUCAST) <sup>2</sup> and Clinical and Laboratory Standards Institute (CLSI) guidelines <sup>3</sup> against a panel of reference strains of microorganisms, including Gram-positive bacteria (*Staphylococcus aureus* ATCC 43300 (Methicillin Resistant *S. aureus* – MRSA), *Staphylococcus aureus* ATCC 29213 (Methicillin Susceptible *S. aureus* – MSSA), *Staphylococcus aureus* ATCC 25923 (Methicillin Susceptible *S. aureus* – MSSA), *Staphylococcus epidermidis* ATCC 12228, *Enterococcus faecalis* ATCC 29212, *Micrococcus luteus* ATCC 10240, *Bacillus subtilis* ATCC 6633 and *Bacillus cereus* ATCC 10876), Gram-negative bacteria (*Escherichia coli* ATCC 25922, *Klebsiella pneumoniae* ATCC 13883, *Proteus mirabilis* ATCC 12453, *Salmonella* Typhimurium ATCC 14028 and *Pseudomonas aeruginosa* ATCC 9027) and fungi belonging to yeasts (*Candida albicans* ATCC 2091, *Candida albicans* ATCC 10231, *Candida parapsilosis* ATCC 22019, *Candida glabrata* ATCC 90030 and *Candida krusei* ATCC 14243). The microorganisms came from American Type Culture Collection (ATCC), routinely used for the evaluation of antimicrobials. All the used microbial cultures were first subcultured on nutrient agar or Sabouraud agar at 35°C for 18-24 h or 30°C for 24-48 h for bacteria and fungi, respectively.

Samples containing examined compounds **A-1 – A-3** were first dissolved in dimethyl sulfoxide – DMSO (20 mg/mL). Subsequently MIC (Minimal Inhibitory Concentration) of

these substances was examined by the microdilution broth method, using their two-fold dilutions in Mueller-Hinton broth (for bacteria) and RPMI 1640 broth with MOPS (for fungi) prepared in 96-well polystyrene plates. Final concentrations of the compounds ranged from 2000 to 15.62  $\mu\text{g/mL}$ . Microbial suspensions were prepared in 0.85% NaCl with an optical density of 0.5 McFarland standard. Next bacterial or fungal suspensions were added per each well containing broth and various concentrations of the examined compounds. After incubation (under the same conditions as before), the MIC was assessed spectrophotometric as the lowest concentration of the samples showing complete bacterial or fungal growth inhibition. Appropriate, growth and sterile controls were carried out. The medium with no tested substances was used also as control. The inhibition of microbial growth was judged by comparison with a control culture prepared without any sample tested. Ciprofloxacin, vancomycin or nystatin (Sigma-Aldrich Chemicals, St. Louis, MO, USA) were used as a reference antibacterial or antifungal compounds, respectively.

The MBC (Minimal Bactericidal Concentration) or MFC (Minimal Fungicidal Concentration) are defined as the lowest concentration of the compounds that is required to kill a particular bacterial or fungal species. MBC or MFC was determined by removing the culture using for MIC determinations from each well and spotting onto appropriate agar medium. Next, the plates were incubated. The lowest compounds concentrations with no visible growth observed were assessed as a bactericidal or fungicidal concentrations. All the experiments were repeated three times and representative data are presented <sup>4,5</sup>.

In this study, no bioactivity was defined as a MIC > 1000  $\mu\text{g/mL}$ , mild bioactivity as a MIC in the range 501 – 1000  $\mu\text{g/mL}$ , moderate bioactivity with MIC from 126 to 500  $\mu\text{g/mL}$ , good bioactivity as a MIC in the range 26 – 125  $\mu\text{g/mL}$ , strong bioactivity with MIC between 10 and 25  $\mu\text{g/mL}$  and very strong bioactivity as a MIC < 10  $\mu\text{g/mL}$  <sup>6</sup>. The MBC/MIC or MFC/MIC ratios were calculated in order to determine bactericidal/fungicidal (MBC/MIC  $\leq$  4, MFC/MIC  $\leq$  4) or bacteriostatic/fungistatic (MBC/MIC > 4, MFC/MIC > 4) effect of the tested compounds.

### **3. Synthesis and NMR spectra**

#### **Typical procedure for the synthesis of (Z)-2-(5-benzylidene-4-oxo-2-thioxothiazolidin-3-yl)acetic acid derivatives**

A mixture of selected aldehyde (4-pyrrolidinobenzaldehyde (0.39 g, 2.20 mmol) – A1, 4-(1H-pyrrol-1-yl)benzaldehyde (0.38 g, 2.20 mmol) - A2 or 4-(1H-imidazol-1-yl)benzaldehyde (0.38

g, 2.20 mmol) – A3), rhodanine-3-acetic acid (0,45 g, 2.30 mmol), ammonium acetate (0,40 g, 5.20 mmol) and acetic acid (30 mL) was heated at reflux. After 4h of intensive mixing, the solid was collected by filtration and washed with water. Crude product was crystallized from acetonitrile.

**(Z)-2-[5-(4-(pyrrolidin-1-yl)-benzylidene)-4-oxo-2-thioxo-thiazolidin-3-yl]-acetic acid**  
(A1)

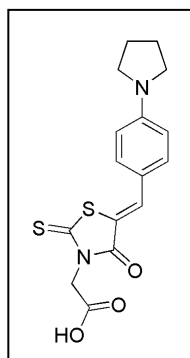

**A-1** was obtained as brown solid with **54%** yield. <sup>1</sup>H NMR (400 MHz, DMSO) δ 7.74 (s, 1H, H<sup>A8</sup>), 7.50 (d, *J* = 9.0 Hz, 2H, H<sup>B3,B5</sup>), 6.71 (d, *J* = 9.0 Hz, 2H, H<sup>B2,B6</sup>), 4.71 (s, 2H, H<sup>A2</sup>), 3.42 – 3.30 (m, 4H, H<sup>C2,C5</sup>), 2.01 – 1.96 (m, 4H, H<sup>C3,C4</sup>). <sup>13</sup>C NMR (100 MHz, DMSO) δ 192.48 (C<sup>A7</sup>), 167.43 (C<sup>A1</sup>), 166.37 (C<sup>A4</sup>), 149.64 (C<sup>B4</sup>), 135.62 (C<sup>A8</sup>), 133.58 (C<sup>B3,B5</sup>), 119.39 (C<sup>B1</sup>), 112.55 (C<sup>B2,B6</sup>), 47.41 (C<sup>C2,C5</sup>), 44.89 (C<sup>A2</sup>), 24.88 (C<sup>C3,C4</sup>).

**(Z)-2-[5-(4-(1H-pyrrol-1-yl)-benzylidene)-4-oxo-2-thioxo-thiazolidin-3-yl]-acetic acid**  
(A2)

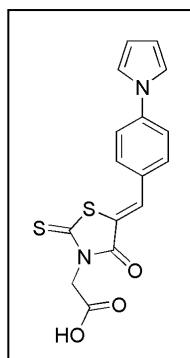

**A-2** was obtained as orange solid with **63%** yield. <sup>1</sup>H NMR (400 MHz, DMSO) δ 7.92 (s, 1H, H<sup>A8</sup>), 7.81 (d, *J* = 8.7 Hz, 2H, H<sup>B2,B6</sup>), 7.75 (d, *J* = 8.7 Hz, 2H, H<sup>B3,B5</sup>), 7.53 (s, 2H, H<sup>C2,C5</sup>), 6.33 (s, 2H, H<sup>C3,C4</sup>), 4.75 (s, 2H, H<sup>A2</sup>). <sup>13</sup>C NMR (100 MHz, DMSO) δ 192.95 (C<sup>A7</sup>), 167.27 (C<sup>A1</sup>), 166.35 (C<sup>A4</sup>), 141.40 (C<sup>B4</sup>), 133.29 (C<sup>A8</sup>), 132.56 (C<sup>B3,B5</sup>), 129.28 (C<sup>A5</sup>), 120.53 (C<sup>B1</sup>), 119.40 (C<sup>B2,B6</sup>), 119.01 (C<sup>C2,C5</sup>), 111.57 (C<sup>C3,C4</sup>), 45.01 (C<sup>A2</sup>).

**(Z)-2-[5-(4-(1H-imidazol-1-yl)-benzylidene)-4-oxo-2-thioxo-thiazolidin-3-yl]-acetic acid**  
(A3)

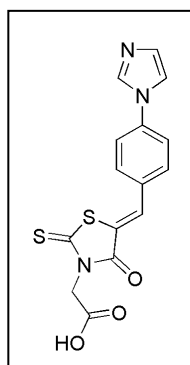

**A-3** was obtained as yellow solid with **71%** yield. <sup>1</sup>H NMR (400 MHz, DMSO) δ 8.44 (s, 1H, H<sup>C5</sup>), 7.95 (s, 1H, H<sup>A8</sup>), 7.92 – 7.86 (m, 3H, H<sup>C2,B2,B6</sup>), 7.82 (d, *J* = 8.6 Hz, 2H, H<sup>B3,B5</sup>), 7.16 (s, 1H, H<sup>C3</sup>), 4.75 (s, 2H, H<sup>A2</sup>). <sup>13</sup>C NMR (100 MHz, DMSO) δ 192.99 (C<sup>A7</sup>), 167.24 (C<sup>A1</sup>), 166.33 (C<sup>A4</sup>), 138.35 (C<sup>B4</sup>), 135.68 (C<sup>C5</sup>), 132.85 (C<sup>A8</sup>), 132.45 (C<sup>B3,B5</sup>), 131.02 (C<sup>A5</sup>), 130.31 (C<sup>C3</sup>), 121.78 (C<sup>B1</sup>), 120.66 (C<sup>B2,B6</sup>), 117.73 (C<sup>C2</sup>), 45.07 (C<sup>A2</sup>).

## NMR Spectra

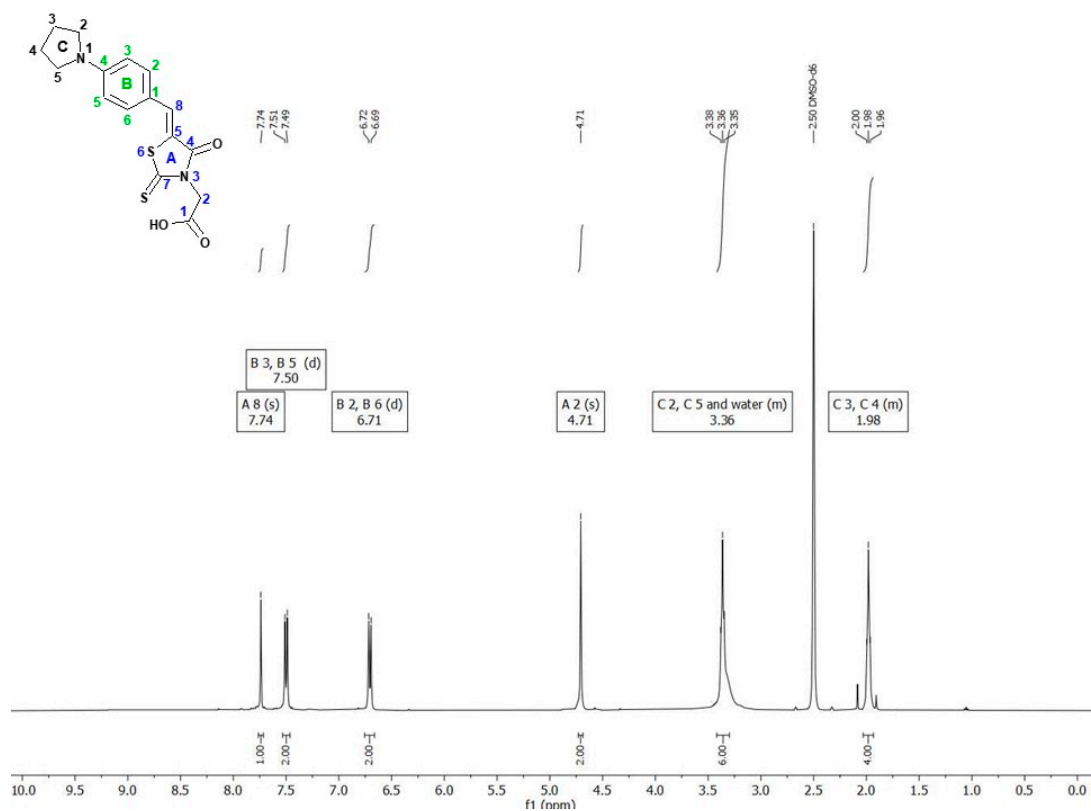

<sup>1</sup>H NMR of A-1

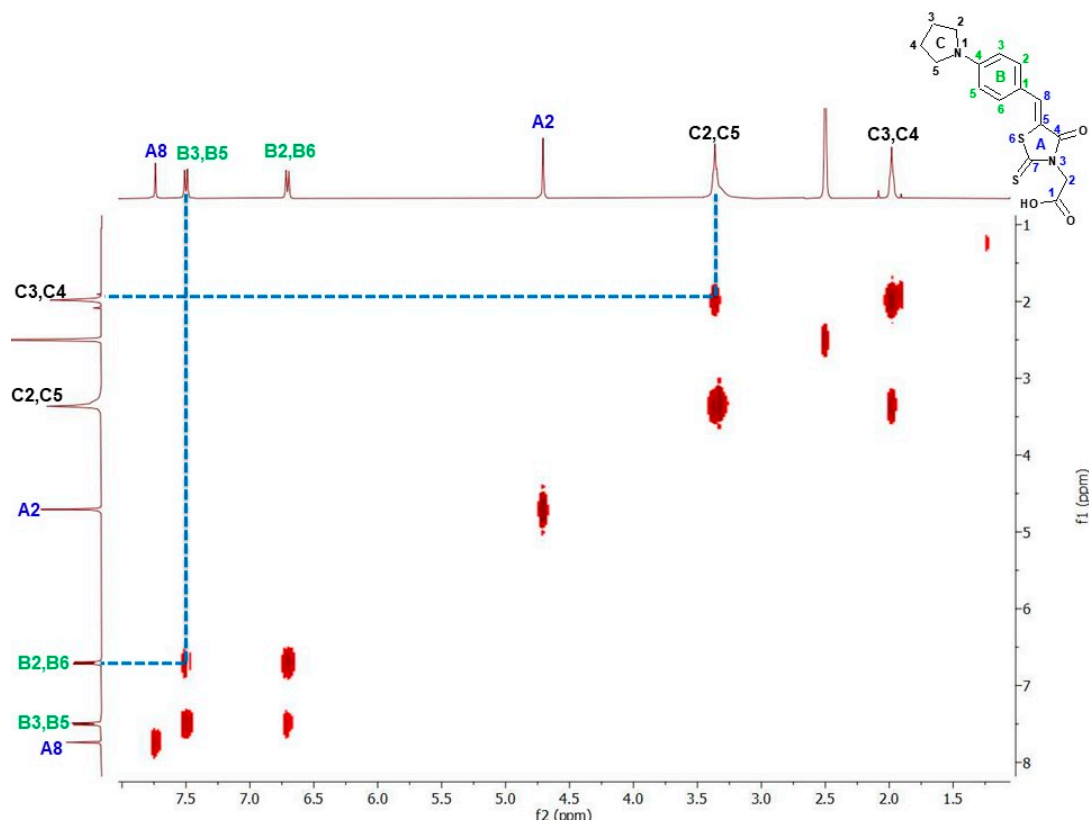

H-H COSY of A-1

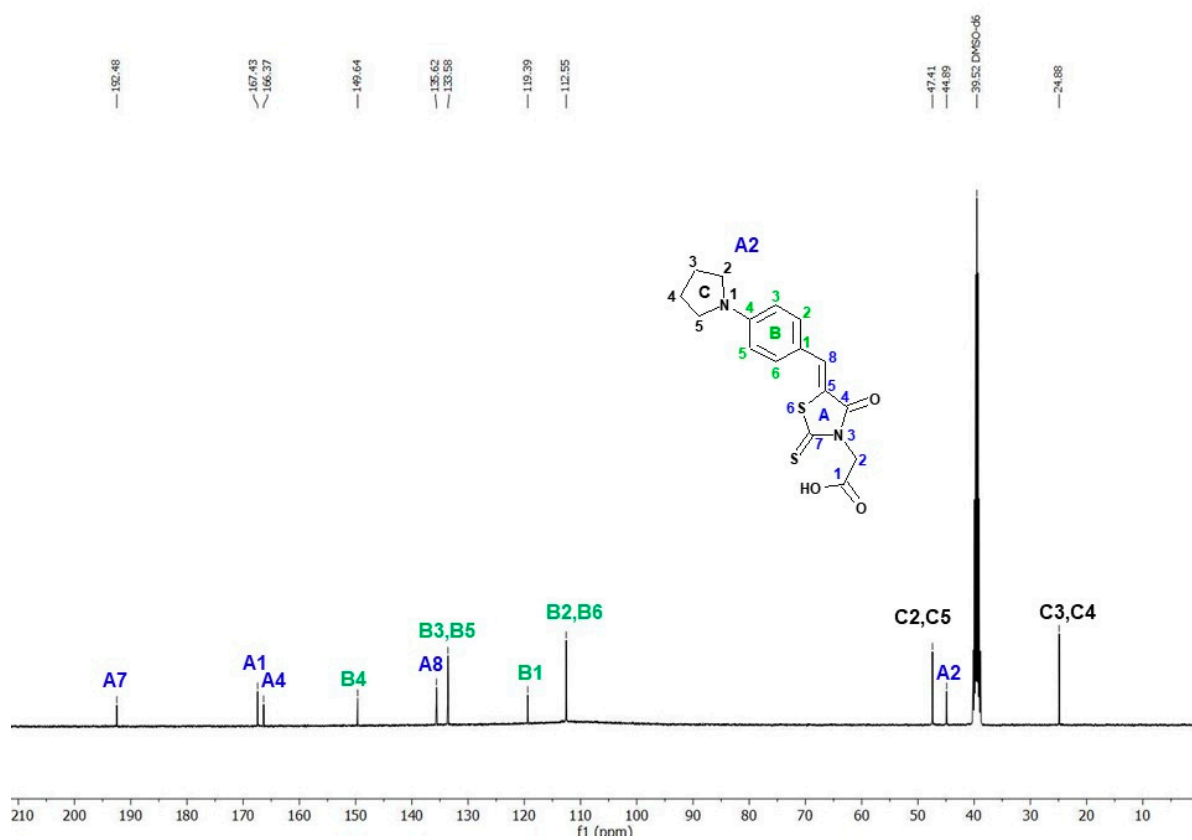

$^{13}\text{C}$  NMR of A-1



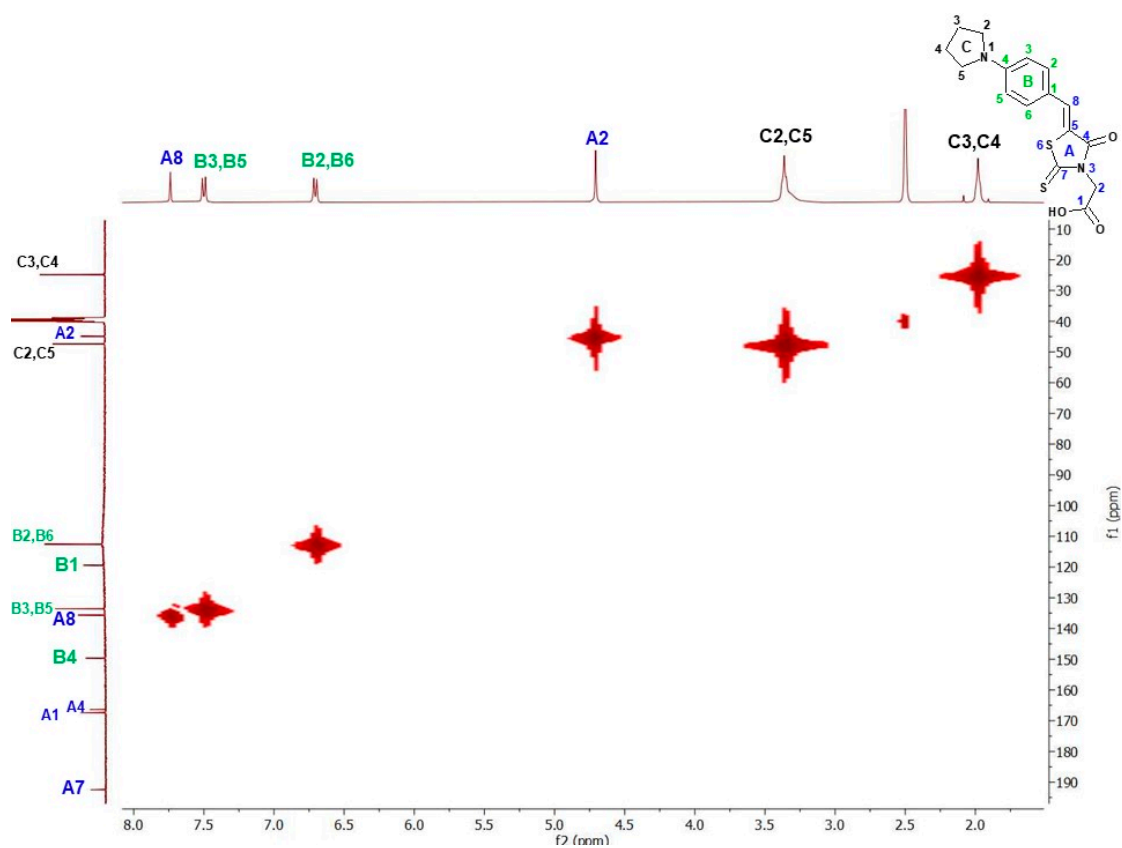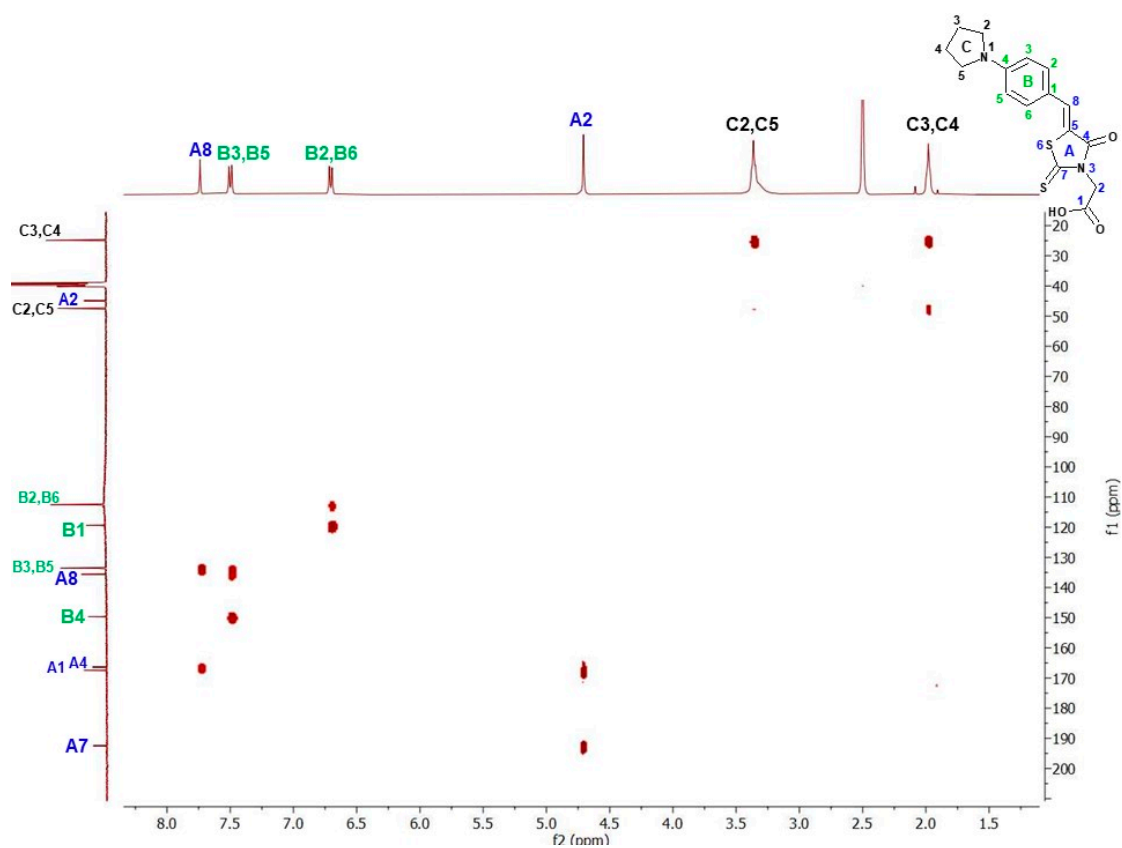

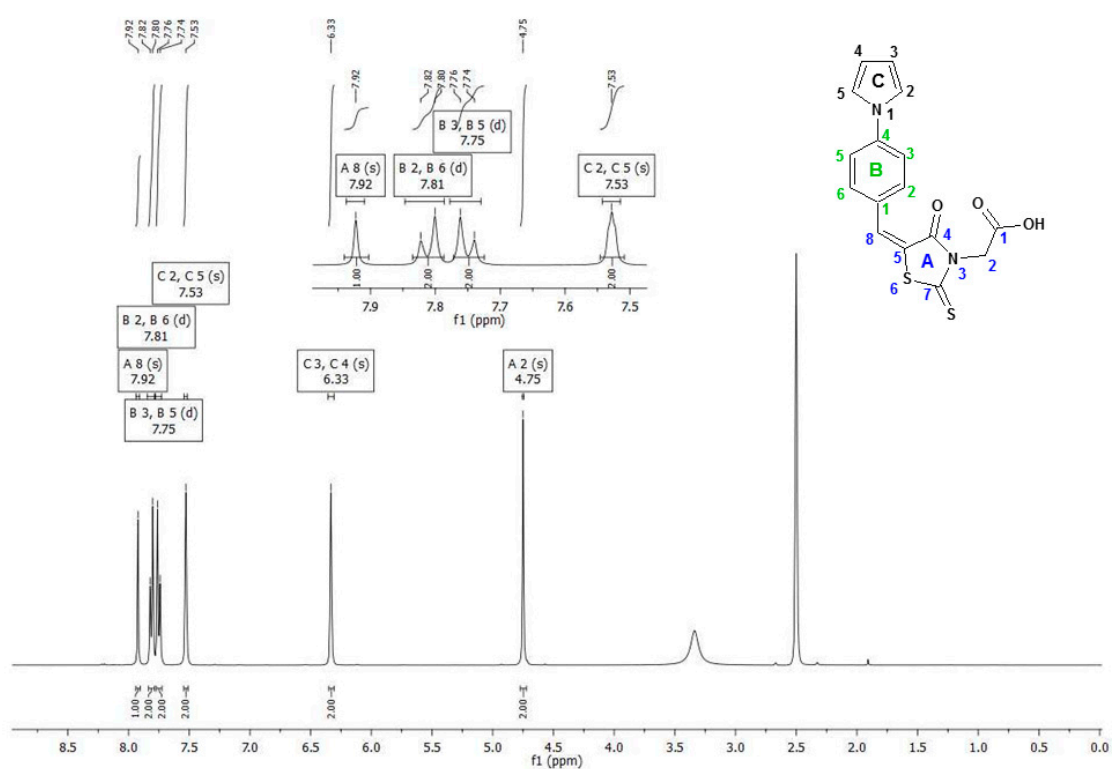

**<sup>1</sup>H NMR of A-2**

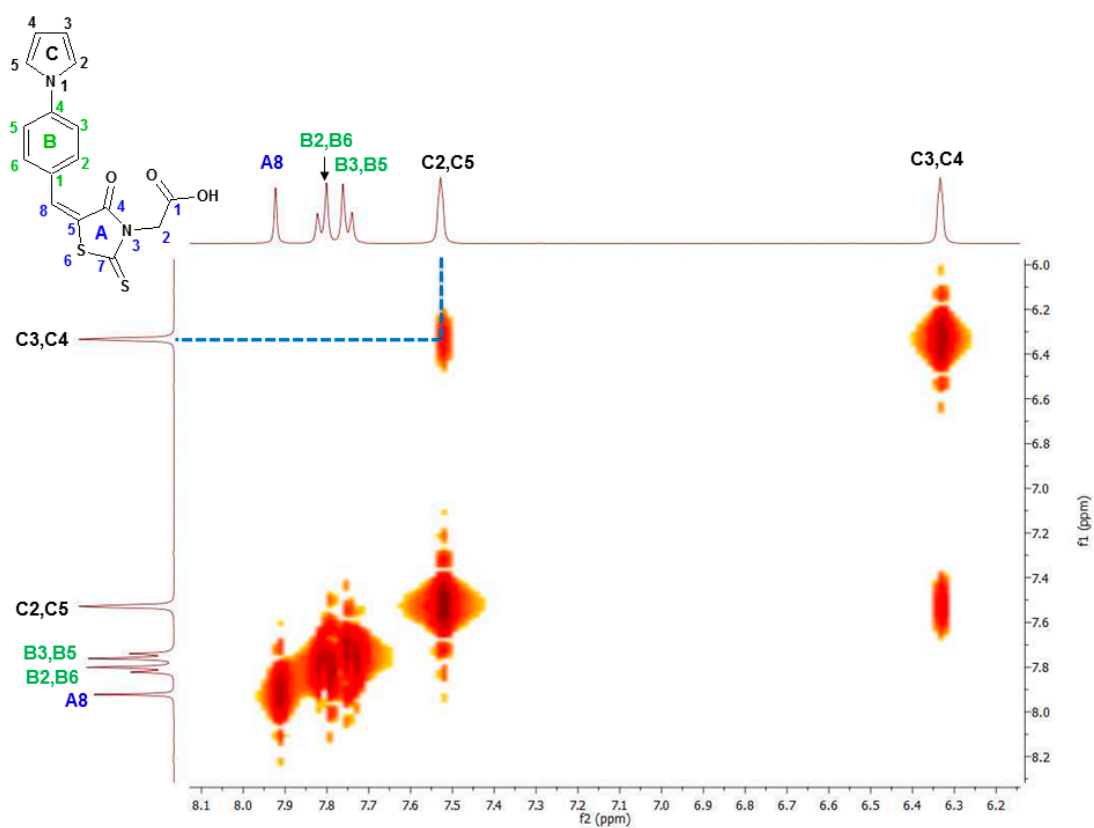

**H-H COSY of A-2**

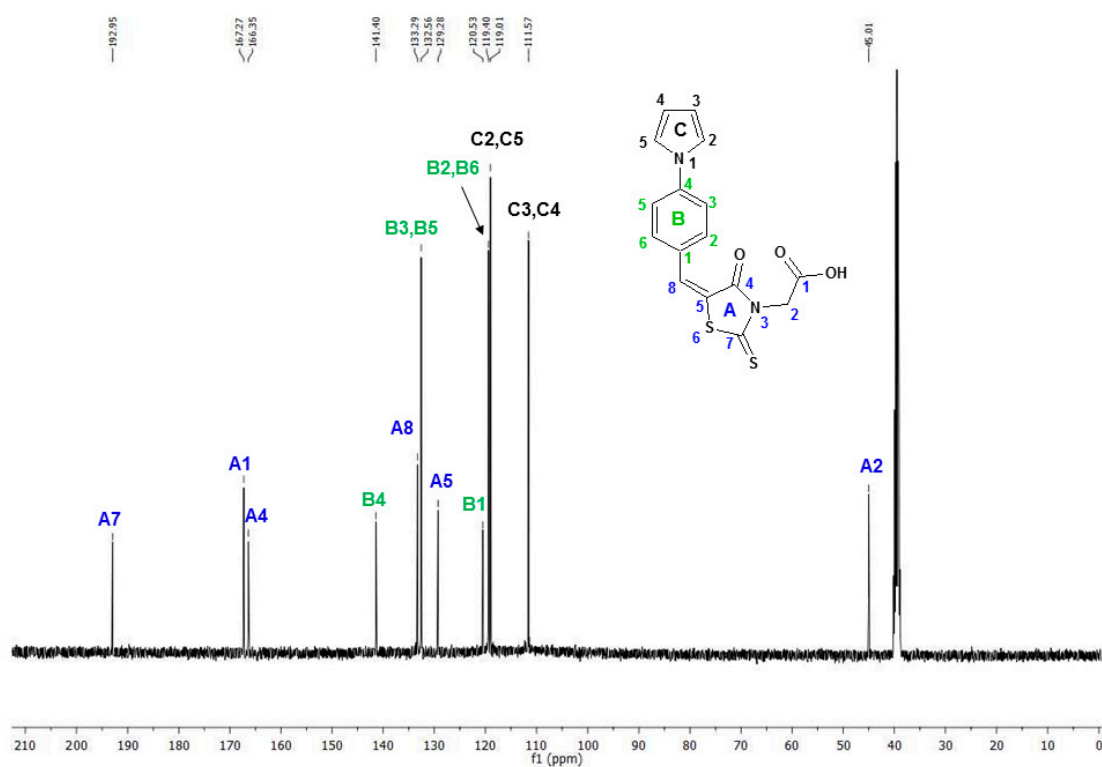

**<sup>13</sup>C NMR of A-2**

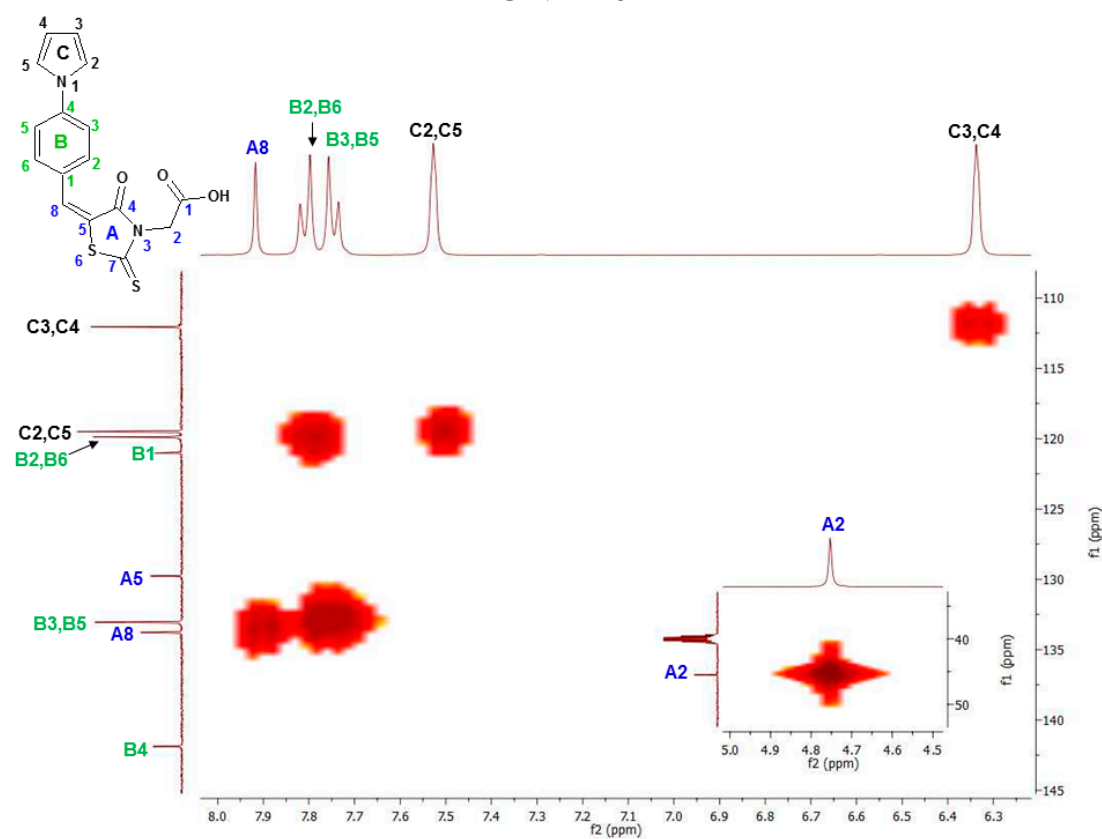

**H-C HMQC of A-2**

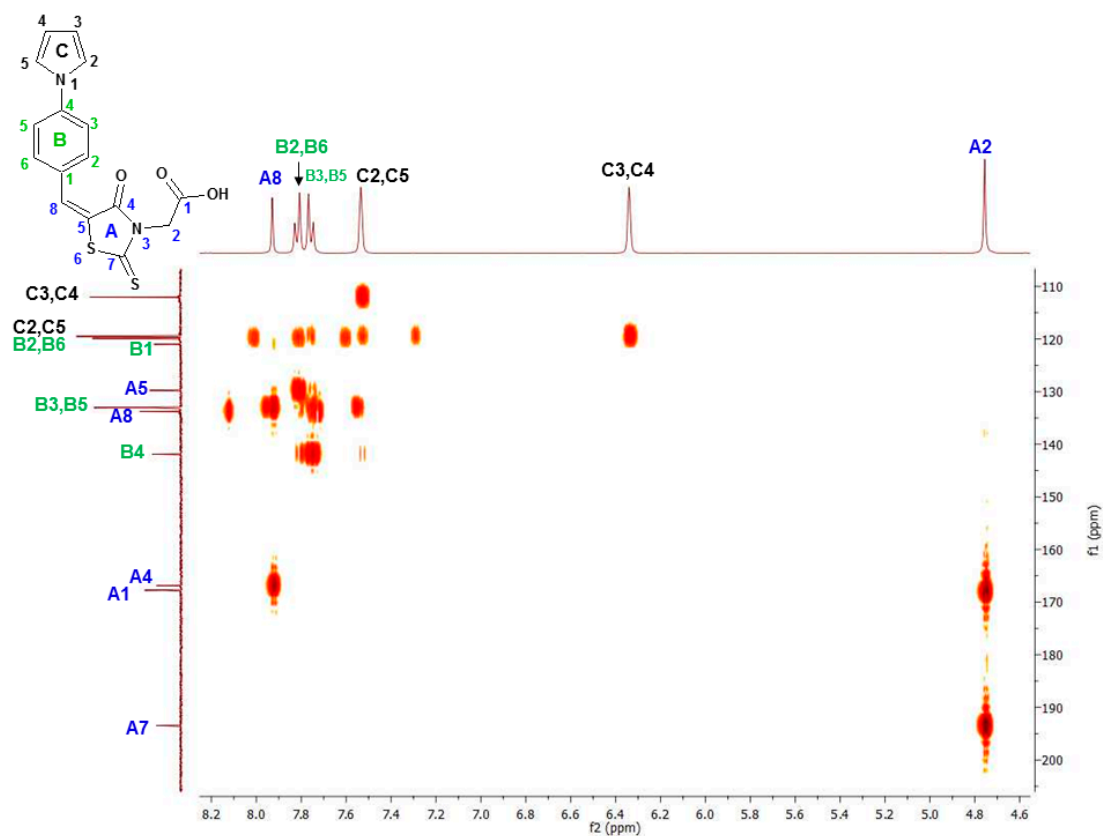

**H-C HMBC of A-2**

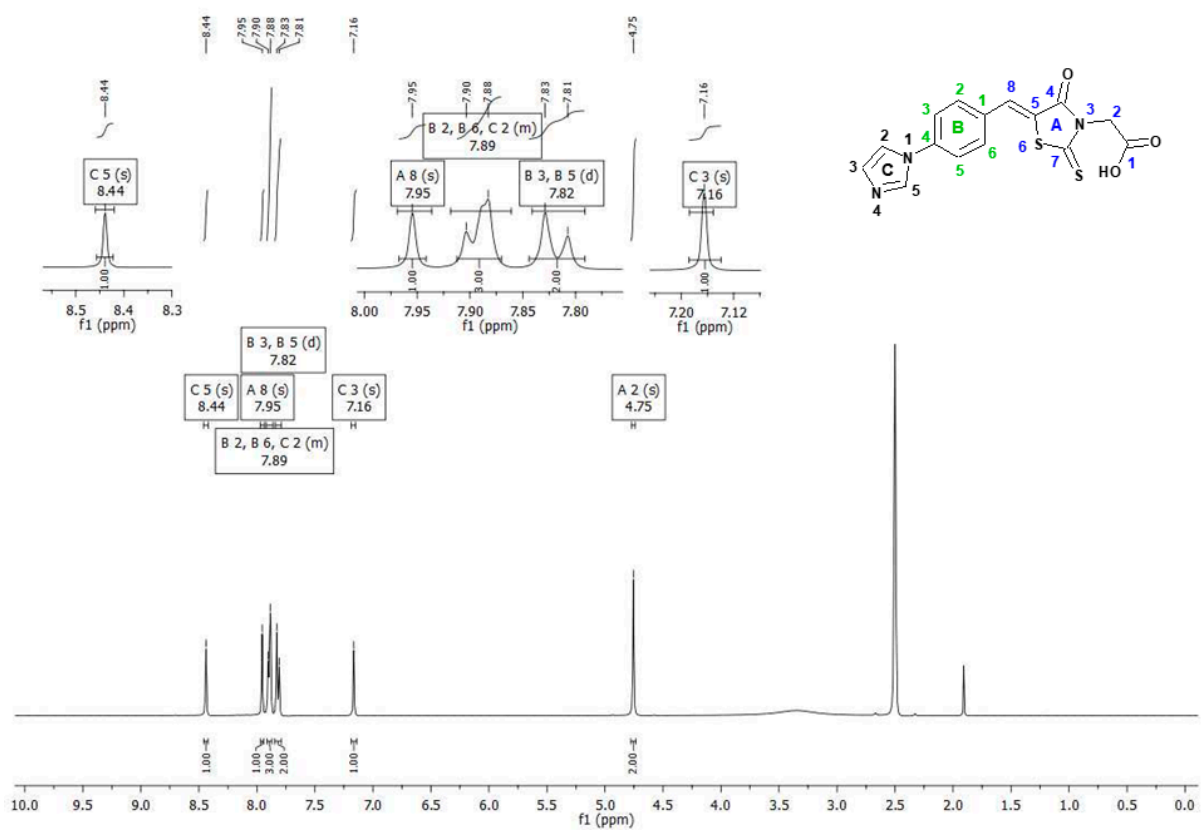

**$^1\text{H}$  NMR of A-3**

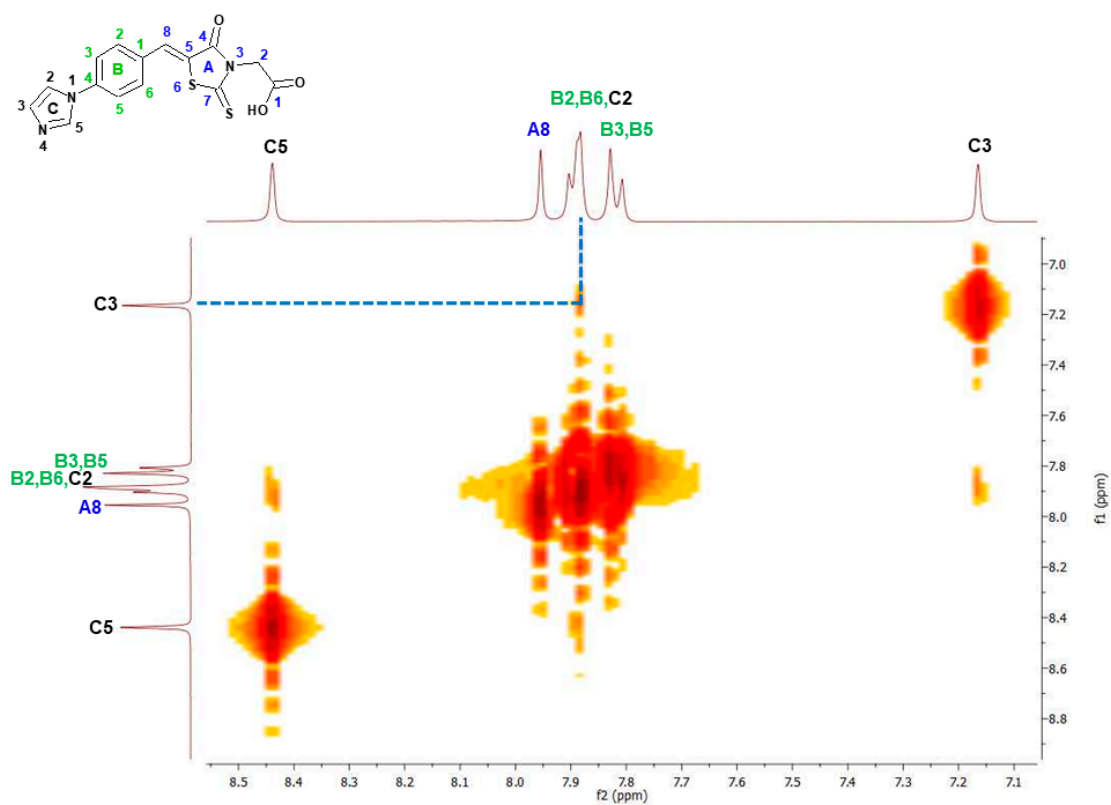

### H-H COSY of A-3

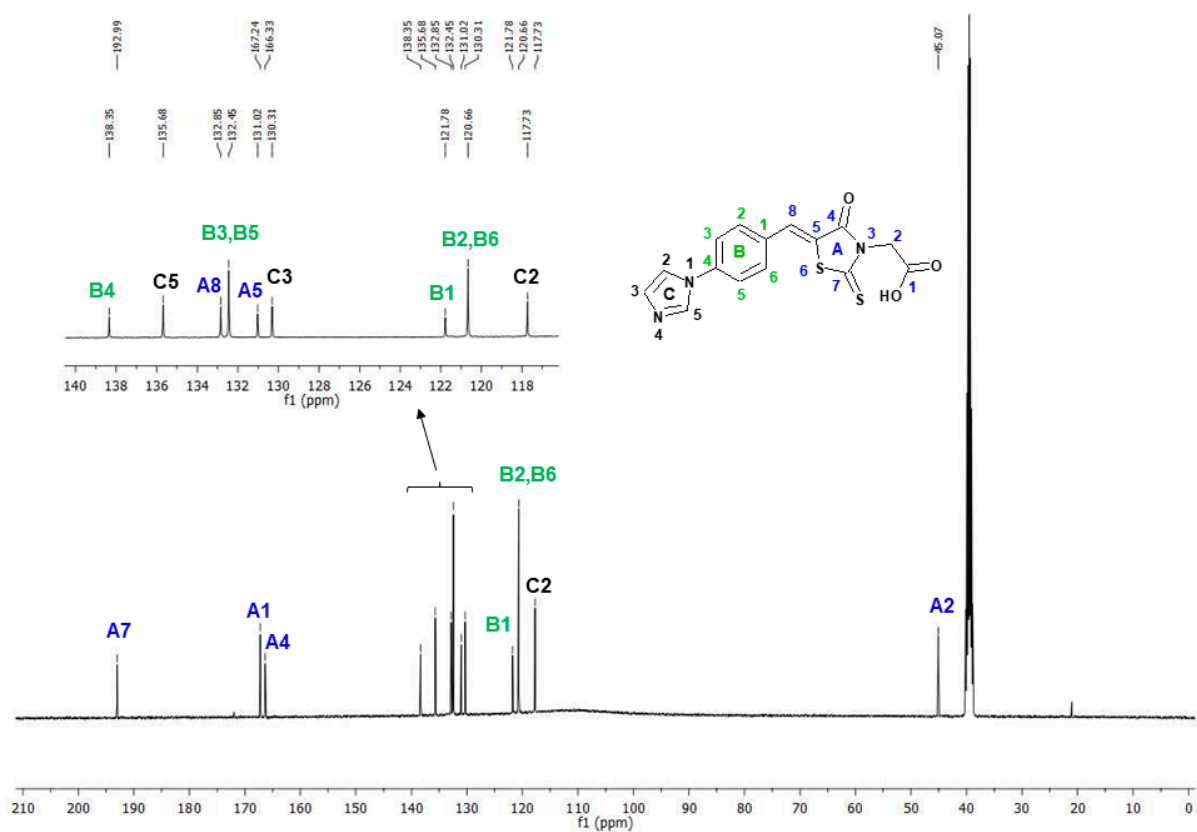

### <sup>13</sup>C NMR of A-3

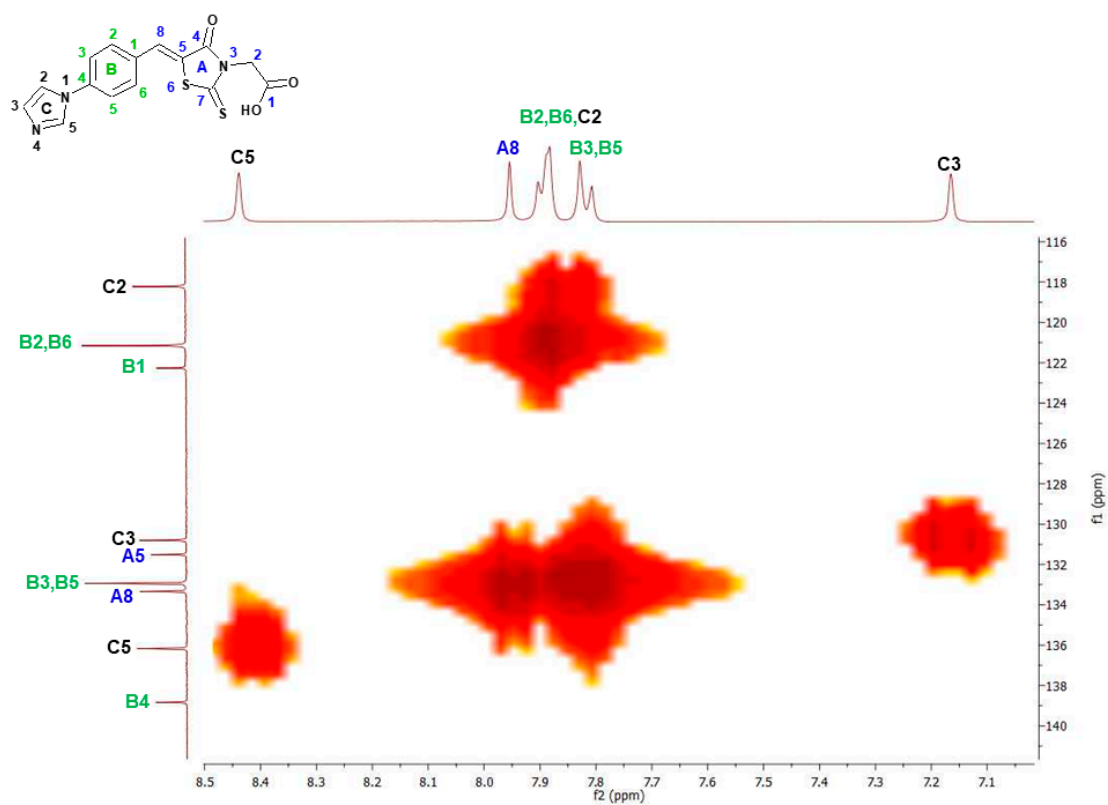

H-C HMQC of A-3

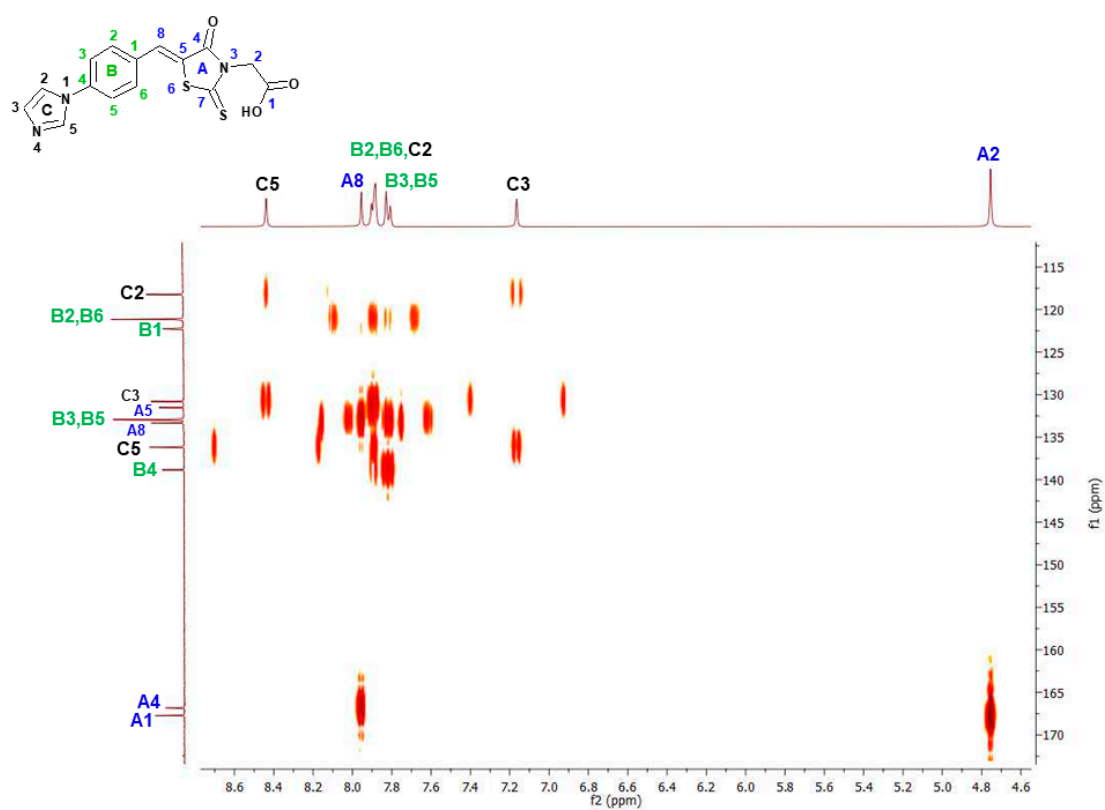

H-C HMBC of A-3

#### 4. Thermal properties

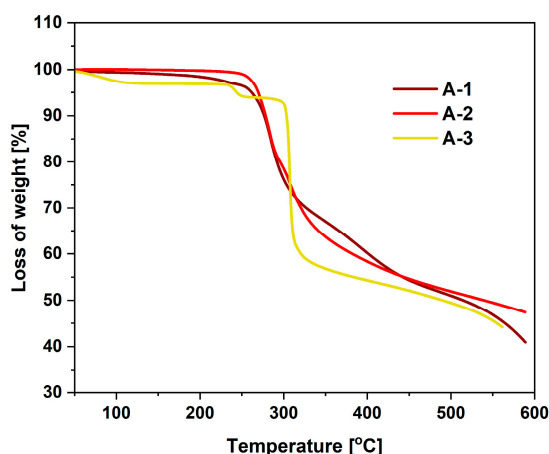

Figure S1. TGA - thermal properties of A-1-3

#### 5. DFT calculations

All geometrical parameters of investigated molecules in their ground ( $S_{GS}$ ) and excited ( $S_{CT}$ ) states were calculated using density functional theory (DFT) approach implemented in Gaussian 09 program package <sup>7</sup> with TIGHT threshold option and PBE0/6-311++G(d,p) basis set. In order to verify that all the structures correspond to the minima on the potential energy surface, an analysis of Hessians was performed. The electronic properties were characterized by computations of the vertical absorption, which were obtained using the time-dependent density functional theory (TDDFT/PBE0) <sup>8</sup> and by including the state-specific (SS) corrected linear response (cLR) approach <sup>9</sup>. All spectroscopic calculations were performed using several different functionals, namely standard-hybrid PBE0 and B3LYP <sup>10,11</sup> functionals, as well as long-range asymptotically corrected functionals such as CAM-B3LYP <sup>12</sup>, HSEH1PBE <sup>13,14</sup> and LC- $\omega$ PBE <sup>15-17</sup>. The dipole moments and polarities of the charge-transfer state (CT) were evaluated by numerical differentiation of the excitation energies ( $E$ ) in the presence of an electric field  $F$  of 0.001 a.u. strength:

$$\Delta\mu_{CT-GS}^i = \frac{E_{CT}(+F^i) - E_{CT}(-F^i)}{-2F^i} - \frac{E_{GS}(+F^i) - E_{GS}(-F^i)}{-2F^i} \quad \text{Equation (S1)}$$

where  $i$  stands for the Cartesian component of the dipole moment difference.

The isotropic average polarizability ( $\langle\alpha\rangle$ ) and first-order hyperpolarizability ( $\beta_{vec}$ ) were determined based on the Gaussian 09 program and defined as:

$$\langle\alpha\rangle = \frac{\alpha_{xx} + \alpha_{yy} + \alpha_{zz}}{3} \quad \text{Equation (S2)}$$

$$\beta_{vec} = \sum_{i=x,y,z} \frac{\mu_i \beta_i}{|\mu|} \quad \text{Equation (S3)}$$

where  $\beta_i (i = x, y, z)$  is given by  $\beta_i = \left(\frac{1}{3}\right) \sum_{j=x,y,z} (\beta_{ijj} + \beta_{jij} + \beta_{jji})$

The density differences were obtained at the PBE0/6-311++G(d,p) level and are represented with a contour threshold of 0.02 a.u. In these graphs, the blue (purple) zones indicate density decrease (increase) upon electronic transition. The charge transfer parameters, namely the charge-transfer distance ( $D_{CT}$ ) and the amount of transferred charge ( $q_{CT}$ ), have been determined following a Le Bahers' procedure<sup>18</sup>. The solvent effect on the linear and nonlinear optical properties has been taken into account using the Integral Equation Formalism for the Polarizable Continuum Model (IEF-PCM)<sup>19,20</sup>.

The binding properties of considered dyes were studied by performing a series of AutoDock 4.2<sup>21-23</sup> simulations. The starting structures of each complex comprised Human Serum Albumin (HAS) taken from PDB ID<sup>24</sup> and each dye as a ligand. The docking region on the target protein was defined by establishing a cubic grid box with the dimensions of 16Å and a grid spacing of 1Å. In AutoDock 4.2 simulations, the Lamarkian genetic algorithm was employed to identify the appropriate binding energy and conformation of compounds. For each atom of the receptor molecule, Gasteiger charges were calculated. The investigation of the binding site was performed using a united-atom scoring function implemented in AutoDock Vina<sup>25</sup>. The docking procedure was repeated ten times for each lysine and this enabled for identification of the sites with the highest affinity of fluorescent probes.

The biological activities were simulated using a combination of the 3D/4D QSAR BiS/MC and CoCon algorithms<sup>26-28</sup>.

**Table S1.** The frontier orbital energies in tested solvents for **Z**-isomers. Values are given in [eV].

|                   | $E_{HOMO}$ | $E_{LUMO}$ | $E_{GAP}$ | $\eta$ | $\mu$   | $\chi$ | $\sigma$ | $S$    | $\omega$ |
|-------------------|------------|------------|-----------|--------|---------|--------|----------|--------|----------|
| <b>A1</b>         |            |            |           |        |         |        |          |        |          |
| Toluene           | -5.7598    | -2.4873    | 3.2725    | 1.6362 | -4.1236 | 4.1236 | 0.6112   | 0.8181 | 5.1961   |
| CHCl <sub>3</sub> | -5.7519    | -2.5442    | 3.2077    | 1.6038 | -4.1481 | 4.1481 | 0.6235   | 0.8019 | 5.3641   |
| THF               | -5.7497    | -2.5701    | 3.1797    | 1.5898 | -4.1599 | 4.1599 | 0.6290   | 0.7949 | 5.4423   |
| MeOH              | -5.7478    | -2.6101    | 3.1378    | 1.5689 | -4.1790 | 4.1790 | 0.6374   | 0.7844 | 5.5657   |
| MeCN              | -5.7478    | -2.6114    | 3.1364    | 1.5682 | -4.1796 | 4.1796 | 0.6377   | 0.7841 | 5.5699   |
| DMSO              | -5.7478    | -2.6120    | 3.1359    | 1.5679 | -4.1799 | 4.1799 | 0.6378   | 0.7840 | 5.5716   |
| <b>A2</b>         |            |            |           |        |         |        |          |        |          |
| Toluene           | -6.4973    | -2.9029    | 3.5944    | 1.7972 | -4.7001 | 4.7001 | 0.5564   | 0.8986 | 6.1459   |
| CHCl <sub>3</sub> | -6.4832    | -2.9070    | 3.5762    | 1.7881 | -4.6951 | 4.6951 | 0.5593   | 0.8940 | 6.1640   |



|      |         |         |        |        |         |        |        |        |        |
|------|---------|---------|--------|--------|---------|--------|--------|--------|--------|
| THF  | -6.4785 | -2.9100 | 3.5686 | 1.7843 | -4.6943 | 4.6943 | 0.5605 | 0.8921 | 6.1751 |
| MeOH | -6.4695 | -2.9122 | 3.5574 | 1.7787 | -4.6909 | 4.6909 | 0.5622 | 0.8893 | 6.1854 |
| MeCN | -6.4723 | -2.9149 | 3.5574 | 1.7787 | -4.6936 | 4.6936 | 0.5622 | 0.8893 | 6.1926 |
| DMSO | -6.4723 | -2.9149 | 3.5574 | 1.7787 | -4.6936 | 4.6936 | 0.5622 | 0.8893 | 6.1926 |

### A3

|                   |         |         |        |        |         |        |        |        |        |
|-------------------|---------|---------|--------|--------|---------|--------|--------|--------|--------|
| Toluene           | -6.7240 | -3.0115 | 3.7125 | 1.8563 | -4.8677 | 4.8677 | 0.5387 | 0.9281 | 6.3824 |
| CHCl <sub>3</sub> | -6.6960 | -2.9911 | 3.7049 | 1.8524 | -4.8435 | 4.8435 | 0.5398 | 0.9262 | 6.3321 |
| THF               | -6.6845 | -2.9832 | 3.7014 | 1.8507 | -4.8339 | 4.8339 | 0.5403 | 0.9253 | 6.3129 |
| MeOH              | -6.6671 | -2.9718 | 3.6954 | 1.8477 | -4.8194 | 4.8194 | 0.5412 | 0.9238 | 6.2854 |
| MeCN              | -6.6663 | -2.9715 | 3.6948 | 1.8474 | -4.8189 | 4.8189 | 0.5413 | 0.9237 | 6.2849 |
| DMSO              | -6.6663 | -2.9715 | 3.6948 | 1.8474 | -4.8189 | 4.8189 | 0.5413 | 0.9237 | 6.2849 |

**Table S2.** CT parameters for the bright low-lying excited state. Values  $q_{CT}$  are given in [e] and  $D_{CT}$  in [Å].

|                   | A1       |          | A2       |          | A3       |          |
|-------------------|----------|----------|----------|----------|----------|----------|
|                   | $q_{CT}$ | $D_{CT}$ | $q_{CT}$ | $D_{CT}$ | $q_{CT}$ | $D_{CT}$ |
| Toluene           | 0.518    | 2.919    | 0.525    | 2.956    | 0.845    | 1.921    |
| CHCl <sub>3</sub> | 0.521    | 3.186    | 0.540    | 3.210    | 0.842    | 2.117    |
| THF               | 0.521    | 3.286    | 0.542    | 3.373    | 0.840    | 2.212    |
| MeOH              | 0.521    | 3.439    | 0.545    | 3.561    | 0.839    | 2.367    |
| MeCN              | 0.521    | 3.439    | 0.547    | 3.557    | 0.839    | 2.370    |
| DMSO              | 0.524    | 3.441    | 0.549    | 3.545    | 0.839    | 2.380    |

**Table S3.** Free energies ( $\Delta G_{solv}$ , kcal/mol) of solvation.

|                   | A1     | A2     | A3     |
|-------------------|--------|--------|--------|
| Toluene           | -17.99 | -16.20 | -19.74 |
| CHCl <sub>3</sub> | -19.12 | -19.63 | -23.62 |
| THF               | -20.37 | -19.60 | -25.06 |
| MeOH              | -22.48 | -19.04 | -22.90 |
| MeCN              | -22.30 | -19.12 | -25.78 |
| DMSO              | -19.91 | -19.10 | -22.81 |

**Table S4.** The vertical excitation energies (in nm).

|           | B3LYP     |        | CAM-B3LYP |        | HSEH1PBE  |        | LC- $\omega$ PBE |        | PBE0      |        |
|-----------|-----------|--------|-----------|--------|-----------|--------|------------------|--------|-----------|--------|
|           | $\lambda$ | $f$    | $\lambda$ | $f$    | $\lambda$ | $f$    | $\lambda$        | $f$    | $\lambda$ | $f$    |
| <b>A1</b> |           |        |           |        |           |        |                  |        |           |        |
| Toluene   | 458.41    | 1.1180 | 407.90    | 1.3172 | 454.16    | 1.1290 | 378.49           | 1.4163 | 461.05    | 1.1781 |

|                   |        |        |        |        |        |        |        |        |        |        |
|-------------------|--------|--------|--------|--------|--------|--------|--------|--------|--------|--------|
| CHCl <sub>3</sub> | 464.93 | 1.1069 | 413.89 | 1.3164 | 460.69 | 1.1175 | 384.43 | 1.4183 | 468.33 | 1.1694 |
| THF               | 466.94 | 1.0967 | 415.85 | 1.3112 | 462.70 | 1.1071 | 386.48 | 1.4144 | 465.25 | 1.1605 |
| MeOH              | 469.02 | 1.0752 | 418.00 | 1.2978 | 464.78 | 1.0849 | 388.89 | 1.4034 | 471.22 | 1.1406 |
| MeCN              | 469.87 | 1.0802 | 418.77 | 1.3023 | 465.62 | 1.0900 | 389.60 | 1.4078 | 473.06 | 1.1456 |
| DMSO              | 473.37 | 1.1008 | 421.77 | 1.3211 | 469.07 | 1.1111 | 392.24 | 1.4259 | 479.45 | 1.1661 |
| <b>A2</b>         |        |        |        |        |        |        |        |        |        |        |
| Toluene           | 429.04 | 1.1234 | 382.79 | 1.2827 | 424.21 | 0.1193 | 368.82 | 1.3585 | 410.33 | 1.1570 |
| CHCl <sub>3</sub> | 425.39 | 1.0642 | 378.78 | 1.2709 | 426.66 | 1.1178 | 364.73 | 1.3483 | 405.47 | 1.1616 |
| THF               | 425.25 | 1.0994 | 376.79 | 1.2589 | 427.44 | 1.1094 | 362.70 | 1.3389 | 402.30 | 1.1591 |
| MeOH              | 424.52 | 1.0765 | 374.01 | 1.1594 | 427.95 | 1.0836 | 359.76 | 1.3150 | 399.48 | 1.1348 |
| MeCN              | 425.01 | 1.0872 | 373.44 | 1.1132 | 428.31 | 1.0920 | 359.22 | 1.3233 | 397.96 | 1.1444 |
| DMSO              | 427.26 | 1.1073 | 374.77 | 1.2475 | 428.34 | 1.1125 | 359.10 | 1.3410 | 402.11 | 1.1642 |
| <b>A3</b>         |        |        |        |        |        |        |        |        |        |        |
| Toluene           | 409.49 | 0.9979 | 362.86 | 1.1939 | 405.97 | 0.9303 | 334.52 | 1.2698 | 395.71 | 1.0800 |
| CHCl <sub>3</sub> | 409.33 | 0.9957 | 363.16 | 1.1821 | 405.67 | 0.9324 | 334.84 | 1.2572 | 375.60 | 1.0718 |
| THF               | 408.81 | 0.9891 | 362.90 | 1.1726 | 405.13 | 0.9266 | 334.64 | 1.2474 | 388.11 | 1.0633 |
| MeOH              | 407.54 | 0.9706 | 362.04 | 1.1533 | 403.86 | 0.9094 | 333.94 | 1.2276 | 383.88 | 1.0447 |
| MeCN              | 407.99 | 0.9764 | 362.47 | 1.1574 | 404.26 | 0.9170 | 334.31 | 1.2316 | 378.33 | 1.0497 |
| DMSO              | 409.94 | 1.0016 | 364.24 | 1.1751 | 406.01 | 0.9479 | 335.84 | 1.2491 | 389.25 | 1.0709 |

**Table S5.** The cLR corrected excitation energies (in nm).

|                   | <b>A1</b> | <b>A2</b> | <b>A3</b> |
|-------------------|-----------|-----------|-----------|
| Toluene           | 457.93    | 425.04    | 398.2     |
| CHCl <sub>3</sub> | 465.62    | 412.71    | 386.89    |
| THF               | 468.73    | 410.76    | 394.66    |
| MeOH              | 473.07    | 407.34    | 390.17    |
| MeCN              | 481.44    | 407.14    | 390.66    |
| DMSO              | 486.80    | 407.68    | 392.95    |

**Table S6.** Calculated values of dipole moments (in D) for the ground and CT excited state.

|                   | <b>A1</b>  |            | <b>A2</b>  |            | <b>A3</b>  |            |
|-------------------|------------|------------|------------|------------|------------|------------|
|                   | $\mu_{GS}$ | $\mu_{CT}$ | $\mu_{GS}$ | $\mu_{CT}$ | $\mu_{GS}$ | $\mu_{CT}$ |
| Toluene           | 13.29      | 20.61      | 5.66       | 8.29       | 2.10       | 4.40       |
| CHCl <sub>3</sub> | 14.53      | 22.46      | 6.16       | 11.43      | 2.42       | 4.44       |

|      |       |       |      |       |      |      |
|------|-------|-------|------|-------|------|------|
| THF  | 15.09 | 23.10 | 6.39 | 13.22 | 2.58 | 4.45 |
| MeOH | 15.96 | 24.53 | 5.56 | 14.81 | 2.86 | 4.51 |
| MeCN | 15.99 | 24.57 | 6.76 | 15.19 | 2.87 | 4.56 |
| DMSO | 16.04 | 24.66 | 6.78 | 15.31 | 2.88 | 5.05 |

**Table S7.** Nonlinear properties of tested isomers. Values are given in (a.u.).

|                   | A1                     |          | A2                     |          | A3                     |         |
|-------------------|------------------------|----------|------------------------|----------|------------------------|---------|
|                   | $\langle\alpha\rangle$ | $\beta$  | $\langle\alpha\rangle$ | $\beta$  | $\langle\alpha\rangle$ | $\beta$ |
| Toluene           | 385.46                 | 10727.20 | 363.34                 | 7709.07  | 344.59                 | 4107.50 |
| CHCl <sub>3</sub> | 424.49                 | 14650.21 | 394.44                 | 9684.80  | 372.90                 | 4890.27 |
| THF               | 443.38                 | 16724.54 | 409.08                 | 10605.80 | 386.30                 | 5227.10 |
| MeOH              | 474.70                 | 20390.60 | 432.69                 | 12197.77 | 408.13                 | 5712.17 |
| MeCN              | 475.65                 | 20499.02 | 433.59                 | 12089.51 | 408.76                 | 5723.49 |
| DMSO              | 477.90                 | 20797.62 | 435.29                 | 12187.90 | 410.34                 | 5759.18 |

**Figure S2.** HOMO / LUMO plots.

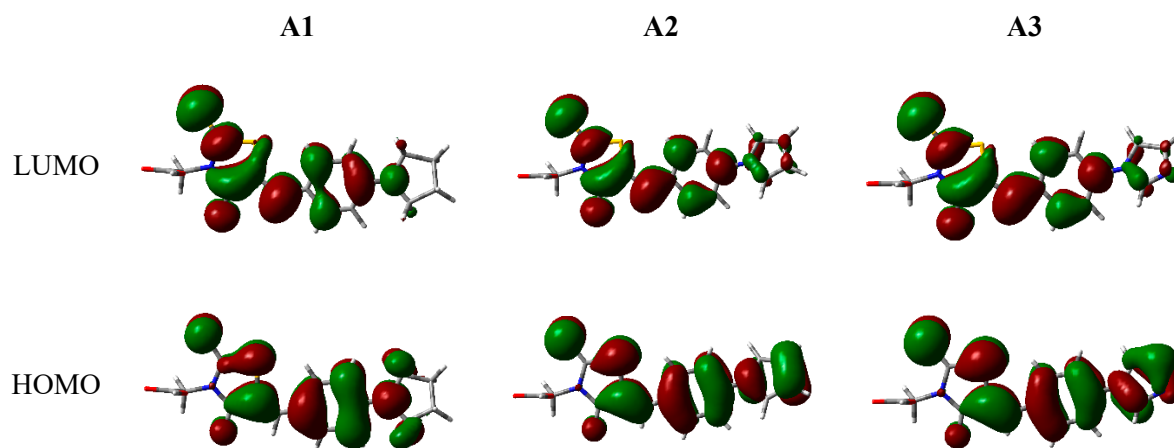

**Figure S3.** The MEP surfaces.

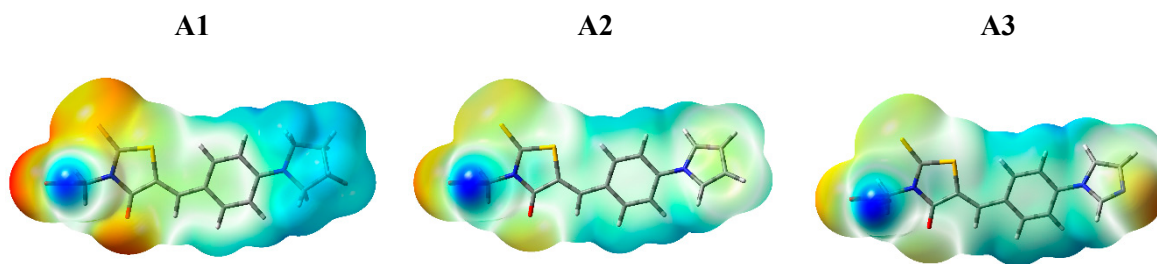

**Figure S4.** Density difference plots.

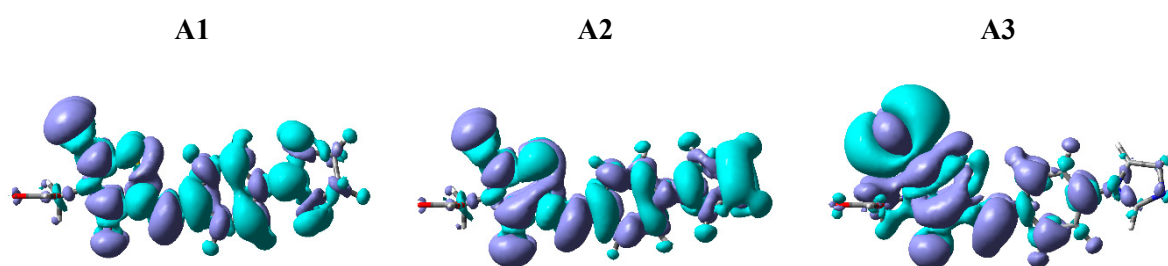

**Figure S5.** Structural changes of the tested derivatives after spatial adjustment to the protein

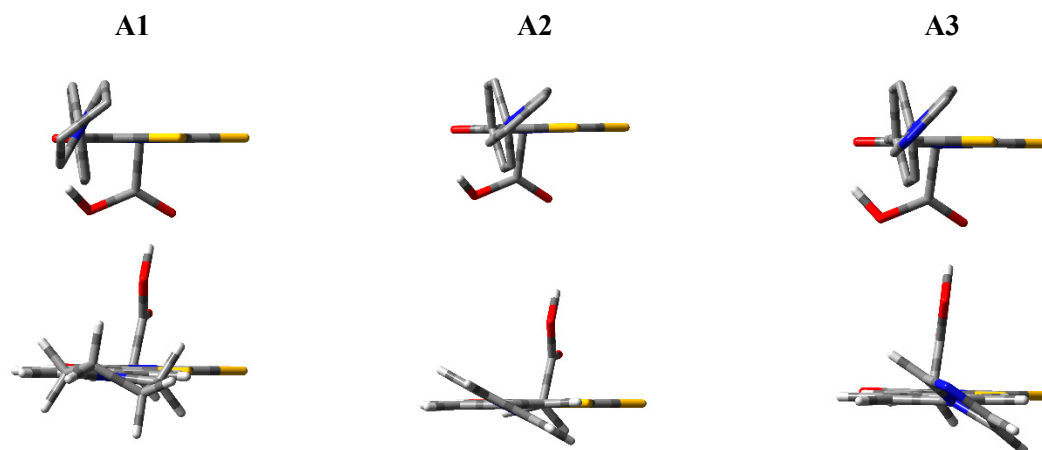

## 6. Optical properties

**Table S8.** Absorption and emission of A-1-3

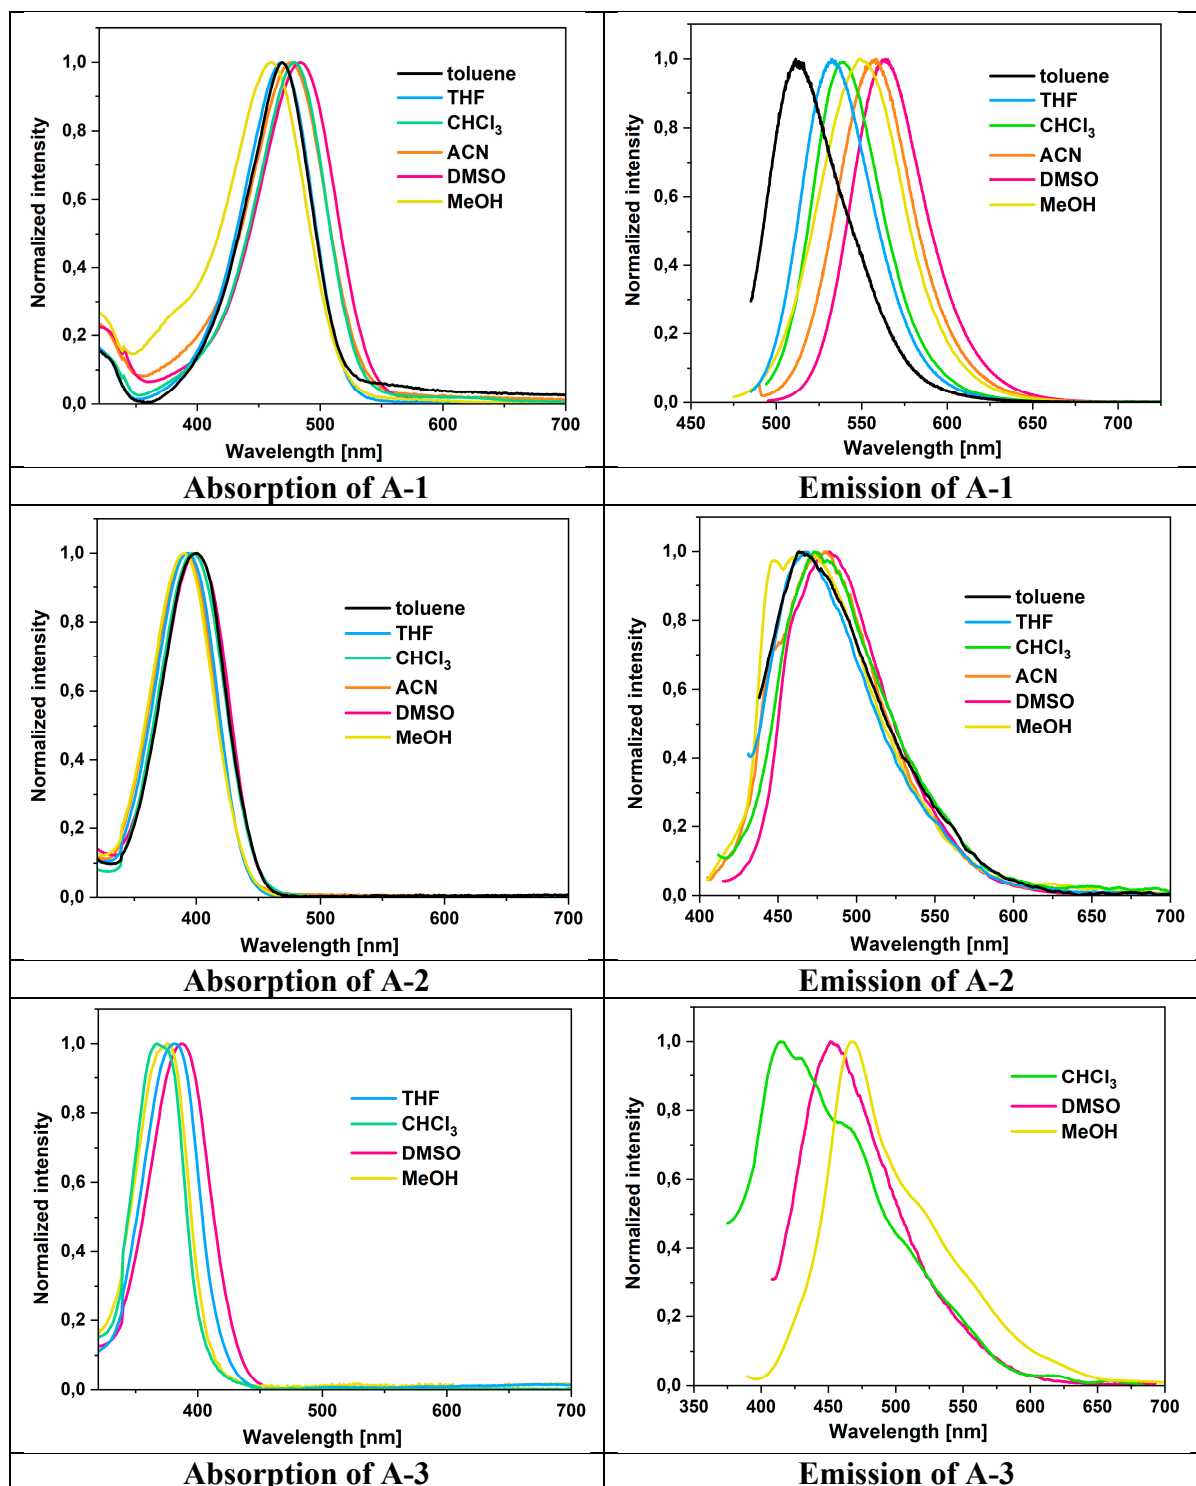

**Table S9.** UV-Vis spectra in DMSO recorded at time intervals at room temperature

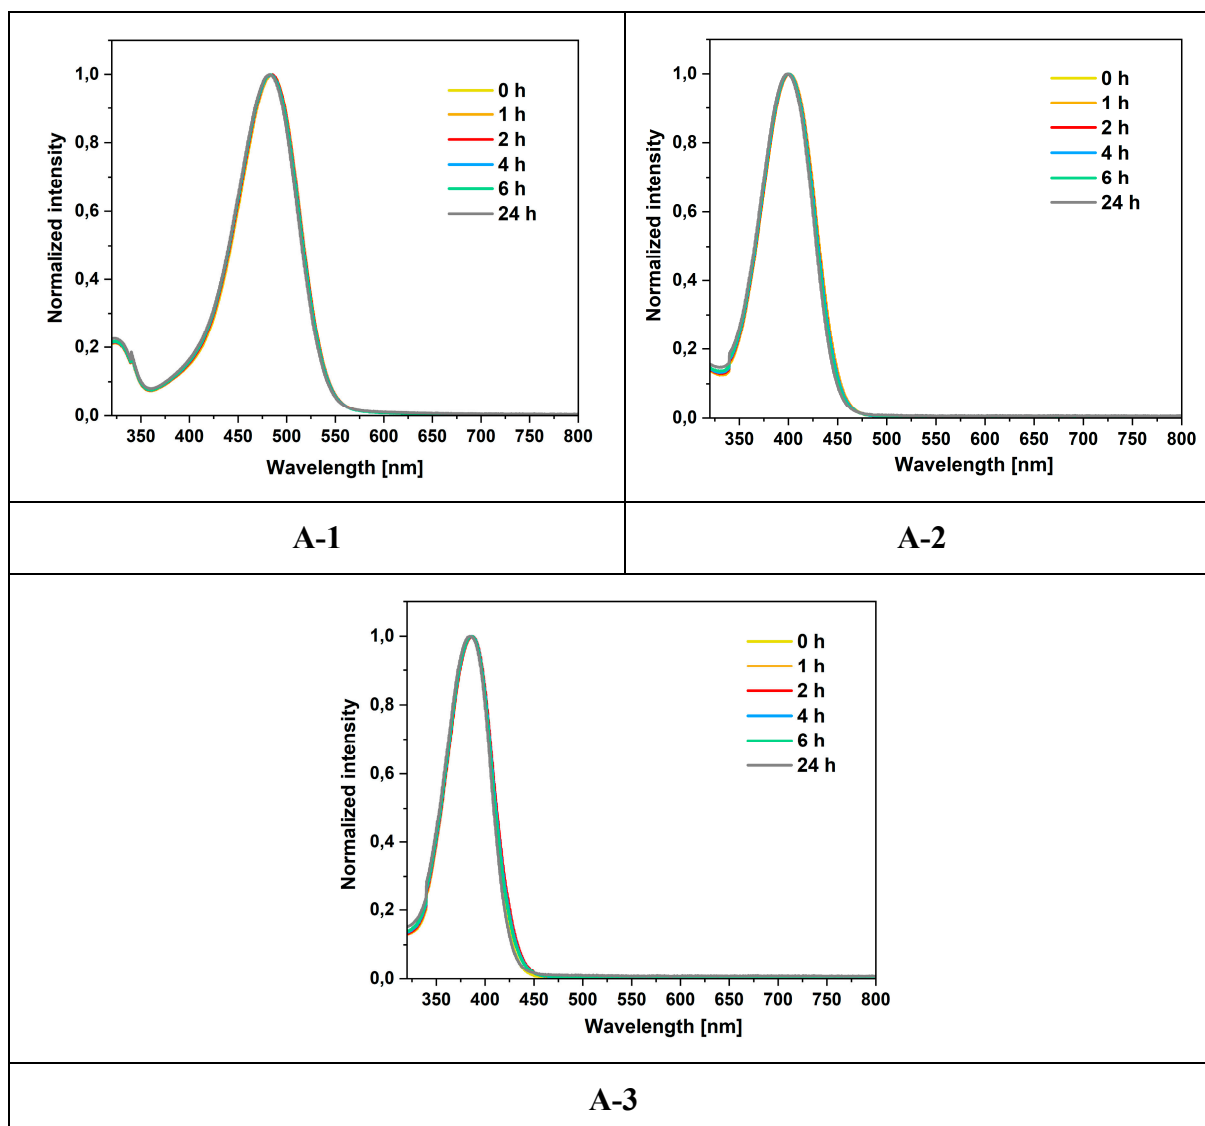

**Table S10.** The Lippert-Mataga plots

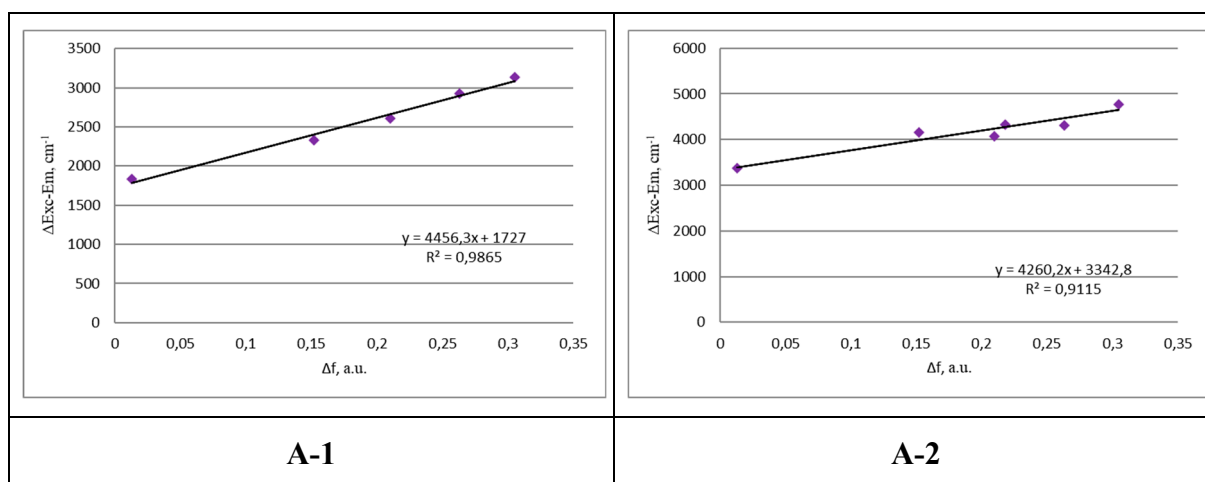

## 7. Literature

- <sup>1</sup> A. Brouwer. *Pure Appl. Chem.*, 2011, 83, 2213–2228.
- <sup>2</sup> European Committee for Antimicrobial Susceptibility Testing (EUCAST) (2003) determination of minimum inhibitory concentrations (MICs) of antibacterial agents by broth dilution. EUCAST discussion document E. Dis 5.1, *Clin. Microbiol. Infect.*, 2003, 9, 1-7.
- <sup>3</sup> Clinical and Laboratory Standards Institute. Reference method for broth dilution antifungal susceptibility testing of yeasts. M27-S4. Clinical and Laboratory Standards Institute, Wayne, PA, USA, 2012.
- <sup>4</sup> A. Biernasiuk, M. Kawczyńska, A. Berecka-Rycerz, B. Rosada, A. Gumieniczek, A. Malm, K. Dzitko, K.Z. Łączkowski. *Med. Chem. Res.*, 2019, 28, 2023-2036.
- <sup>5</sup> I. Wiegand, K. Hilpert, R.E.W Hancock. *Nat. Protoc.*, 2008, 3, 163-75.
- <sup>6</sup> F. O'Donnell, T.J. Smyth, V.N. Ramachandran, W.F. Smyth. *Int. J. Antimicrob. Agents.*, 2010, 35, 30-38.
- <sup>7</sup> M.J. Frisch, G.W. Trucks, G.B. Schlegel et al. Gaussian 09, Revision A.1, Gaussian, Inc., Wallingford CT, 2009
- <sup>8</sup> C. Adamo, G.E. Scuseria, V. Barone, *J. Chem. Phys.* 1999, 111, 2889-2899. DOI: 10.1063/1.479571
- <sup>9</sup> C. Guido, S. Caprasecca, <https://www1.dcci.unipi.it/molecolab/tools/white-papers/pisalr/>; 2016. DOI: 10.13140/RG.2.1.1903.7845
- <sup>10</sup> J. P. Perdew, K. Burke, and M. Ernzerhof, *Phys. Rev. Lett.*, 1996, **77**, 3865-68. DOI: 10.1103/PhysRevLett.77.3865
- <sup>11</sup> J. P. Perdew, K. Burke, and M. Ernzerhof, *Phys. Rev. Lett.*, 1997, **78**, 1396. DOI: 10.1103/PhysRevLett.78.1396
- <sup>12</sup> T. Yanai, D.P. Tew, N.C. Handy, *Chem. Phys. Lett.*, 2004, **393**, 51-57. DOI:10.1016/j.cplett.2004.06.011
- <sup>13</sup> J. Heyd, G. E. Scuseria, *J. Chem. Phys.* 2004, **120**, 7274. DOI: 10.1063/1.1668634
- <sup>14</sup> J. Heyd, G. E. Scuseria, M. Ernzerhof, *J. Chem. Phys.*, 2006, **124**, 219906. DOI: 10.1063/1.2204597

- <sup>15</sup> H. Iikura, T. Tsuneda T, Yanai, K. Hirao K, *J. Chem. Phys.*, 2001, **115**, 3540-3544. DOI: 10.1063/1.1383587
- <sup>16</sup> O.A. Vydrov, G.E. Scuseria, *J. Chem. Phys.*, 2006, **125**, 234109-9. DOI: 10.1063/1.2409292.
- <sup>17</sup> O.A. Vydrov, G.E. Scuseria GE, J.P. Perdew, *J. Chem. Phys.*, 2007, **126**, 1541009-9. DOI: 10.1063/1.2723119
- <sup>18</sup> M. Caricato, M. *J. Chem. Phys.*, 2013, **139**, 044116. DOI: 10.1063/1.4816482
- <sup>19</sup> T. Le Bahers, C. Adamo, I. Ciofini, *J. Chem. Theory Comput.*, 2011, **7**, 2498–2506. DOI: 10.1021/ct200308m
- <sup>20</sup> M.T. Cancés, B. Mennucci, J. Tomasi, *J. Chem. Phys.*, 1997, **107**, 3032-3041. DOI: 10.1063/1.474659
- <sup>21</sup> G.M. Morris, R. Huey, W. Lindstrom, M.F. Sanner, R.K. Belew, D.S. Goodsell, A.J. Olson, *J. Comput. Chem.* 2009, **30**, 2785-2791. DOI: 10.1002/jcc.21256
- <sup>22</sup> S. Cosconati, S. Forli, A.L. Perryman, R. Harris, D.S. Goodsell, A.J. Olson, *Expert Opin. Drug Discovery*, 2010, **5**, 597-607. DOI: 10.1517/17460441.2010.484460
- <sup>23</sup> S. Forli, A.J. Olson, *J. Med. Chem.* 2012, **55**, 623-638. DOI: 10.1021/jm2005145
- <sup>24</sup> S. Sugio, S. Mochizuki, M. Noda, A. Kashima, Crystal structure of human serum albumin, Protein Data Bank, Rutgers University, 1998. <https://doi.org/10.2210/pdb1ao6/pdb>
- <sup>25</sup> O. Trott, A.J. Olson, *J. Comp. Chem.* 2010, **31**, 455-461. DOI: 10.1002/jcc.21334
- <sup>26</sup> V. Potemkin, M. Grishina, *Drug Discov. Today* 2008, **13(21-22)**, 952-959. DOI: 10.1016/j.drudis.2008.07.006
- <sup>27</sup> V. Potemkin, M. Grishina, *J. Comput. Aided. Mol. Des.* 2008, 22(6-7), 489-505. DOI: 10.1007/s10822-008-9203-x
- <sup>28</sup> V. Potemkin, A.A. Pogrebnoy, M.A. Grishina, *J. Chem. Inf. Model.* 2009, **49(6)**, 1389-406. DOI: 10.1021/ci800405n
